# Supplementary material
Source: HighWire-hosted journal article supplement (https://jnis.bmj.com/content/neurintsurg-2021-018230)
Supplement: inline-supplementary-material-1 [file inline-supplementary-material-1.pdf]

## Supplementary Materials/Appendices

### Appendix 1: Database Search Terms

#### PubMed terms:

(SARS-CoV-2[tw] or Severe acute respiratory syndrome coronavirus 2[tw] or COVID-19[tw] or COVID19[tw] or coronavirus disease 2019[tw] or 2019 novel coronavirus[tw] or 2019-nCoV[tw] or "severe acute respiratory syndrome coronavirus 2"[nm] or "COVID-19"[nm] or coronavirus disease 2019[tw] or coronavirus disease-19[tw] or Wuhan seafood market pneumonia virus[tw] or wuhan coronavirus[tw] or 2019 pandemic[tw])

AND

("Stroke"[Mesh:NoExp] or stroke\*[tw] or Cerebrovascular Accident\*[tw] or CVA[tw] or CVAs[tw] or Apoplexy[tw] or Brain Vascular Accident\*[tw] or brain accident\*[tw] or brain attack\*[tw] or brain insult\*[tw] or brain ischemic attack\*[tw] or brain ischaemic attack\*[tw] or brain vascular accident\*[tw] or cerebral insult\*[tw] or cerebral vascular accident[tw] or cerebral vascular insufficiency[tw] or cerebro vascular accident\*[tw] or cerebrovascular arrest[tw] or cerebrovascular insufficiency[tw] or cerebrovascular insult\*[tw] or cerebrovascular failure[tw] or cerebrovascular injury[tw] or cerebrum vascular accident\*[tw] or ischemic cerebral attack[tw] or ischemic cerebral seizure\*[tw] or ischaemic cerebral attack\*[tw] or ischaemic cerebral seizure\*[tw])

AND

("Time Factors"[Mesh] or "Time-to-Treatment"[Mesh] or Door-to-Treatment Time\*[tw] or delayed treatment\*[tw] or treatment delay\*[tw] or time-to-treatment\*[tw] or "Delivery of Health Care, Integrated"[Mesh] or delivery of health care[tw] or door-to-needle[tw] or door-to-groin puncture[tw] or door-to-alteplase[tw] or door-to-er[tw] or door-to-doctor[tw] or door-to-physician[tw] or door-to-CT[tw] or door-to-computed tomography[tw] or door-to -stroke team [tw] or LKW-to-arrival[tw] or last known well-to-arrival[tw] or door-to-reperfusion[tw] or length of stay[tw] or length of hospitalization[tw] or length of hospital stay[tw] or stroke quality metric\*[tw] or discharge outcome\*[tw] or outcome\*[tw] or practice\*[tw] or guideline\*[tw] or recanalization rate\*[tw] or "defect-free care"[tw] or "discharge modified Rankin Scale"[tw] or "discharge mRS"[tw] )

#### Embase terms:

((COVID-19 or COVID19 or severe acute respiratory syndrome coronavirus 2 or "2019-nCoV" or SARS-CoV-2).tw. or (Wuhan OR novel OR 2019 OR 2020) adj5 (coronavirus).tw.)

AND

(cerebrovascular accident/ OR (stroke or apoplexy\* or brain accident or brain attack or brain insult or brain ischemic attack or brain ischaemic attack or brain vascular accident or cerebral insult or cerebrovascular accident or cerebral vascular accident or cerebral vascular insufficiency or cerebro vascular accident or cerebrovascular arrest or cerebrovascular insufficiency or cerebrovascular insult or cerebrovascular failure or cerebrovascular injury or cerebrum vascular accident or CVA or CVAs or ischemic cerebral attack or ischemic cerebral seizure or ischaemic cerebral attack or ischaemic cerebral seizure).tw.)

AND

Time factor/ or Time to treatment/ or length of stay/ or (time factor\* or door to treatment time or onset to treatment time or symptom to treatment time or time to therapy or delayed treatment\* or treatment delay\* or time to treatment\* or door to needle or door to groin puncture or door to alteplase or door to ED physician or door to head CT or door to computed tomography or door to stroke team or LKW to arrival or last known well to arrival or door to reperfusion or door to Tissue plasminogen activator or door to IV-tPA or door to intravenous thrombolysis or door to mechanical thrombectomy or length of stay or length of hospitalization or length of hospital stay or stroke quality metric\* or discharge outcome\* or outcome\* or practice\* or guideline\* or recanalization rate\* or defect-free care or discharge modified Rankin Scale or discharge mRS).tw.

**Cochrane terms:**

(COVID-19 or COVID19 or "severe acute respiratory syndrome coronavirus 2" or "2019-nCoV or SARS-CoV-2)

AND

(stroke or "Cerebrovascular Accident" or CVA or Apoplexy or "Brain Vascular Accident" or "brain accident" or "brain attack" or "brain insult" or "brain ischemic attack" or "brain ischaemic attack" or "brain vascular accident" or "cerebral insult" or "cerebral vascular accident" or "cerebral vascular insufficiency" or "cerebro vascular accident" or "cerebrovascular arrest" or "cerebrovascular insufficiency" or "cerebrovascular insult" or "cerebrovascular failure" or "cerebrovascular injury" or "cerebrum vascular accident" or "ischemic cerebral attack" or "ischemic cerebral seizure" or "ischaemic cerebral attack" or "ischaemic cerebral seizure")

## Appendix 2: Raw Time Metric Values by Study

| Study               | LKW                 |                 | DTI                 |                 | DTN                 |                 | DTG                 |                 | DTR                 |                 |
|---------------------|---------------------|-----------------|---------------------|-----------------|---------------------|-----------------|---------------------|-----------------|---------------------|-----------------|
|                     | Pre-COVID Mean (SD) | COVID Mean (SD) |
| Aboul-Nour 2021     | 370 (488)           | 652 (866)       | 40 (28)             | 48 (63)         | —                   | —               | —                   | —               | —                   | —               |
| Agarwal 2020        | 452 (626)           | 380 (510)       | 13 (7)              | 16 (6)          | 37 (15)             | 38 (22)         | 72 (27)             | 84 (26)         | 67 (47)             | 118 (55)        |
| Altschul 2020       | 232 (303)           | 514 (663)       | —                   | —               | —                   | —               | 85 (67)             | 87 (35)         | —                   | —               |
| Amukotwa 2020       | —                   | —               | 23 (13)             | 11 (7)          | —                   | —               | —                   | —               | —                   | —               |
| Aref 2021           | 960 (1486)          | 625 (776)       | —                   | —               | —                   | —               | —                   | —               | —                   | —               |
| Candelaresi 2021    | —                   | —               | 38 (15)             | 43 (23)         | —                   | —               | —                   | —               | —                   | —               |
| Chen 2021           | 88 (46)             | 93 (67)         | 14 (12)             | 15 (7)          | 60 (24)             | 38 (15)         | —                   | —               | —                   | —               |
| Cummings 2020       | 199 (274)           | 153 (187)       | —                   | —               | 56 (22)             | 60 (22)         | —                   | —               | —                   | —               |
| D'Anna 2021         | 136 (165)           | 163 (276)       | 24 (36)             | 25 (35)         | 39 (9)              | 40 (8)          | 134 (232)           | 122 (205)       | —                   | —               |
| Ghoreishi 2020      | 332 (390)           | 355 (384)       | —                   | —               | 22 (11)             | 21 (10)         | —                   | —               | —                   | —               |
| Gu 2021             | 240 (350)           | 391 (545)       | —                   | —               | 55 (27)             | 66 (29)         | —                   | —               | —                   | —               |
| Huo 2021            | 239 (168)           | 242 (205)       | —                   | —               | 129 (69)            | 221 (135)       | —                   | —               | —                   | —               |
| Jasne 2020          | 343 (498)           | 362 (489)       | —                   | —               | 59 (27)             | 71 (49)         | —                   | —               | 131 (80)            | 118 (72)        |
| John 2020           | 621 (744)           | 517 (557)       | —                   | —               | 36 (13)             | 43 (15)         | 68 (20)             | 104 (33)        | —                   | —               |
| Katsanos 2020       | 269 (241)           | 157 (109)       | 11 (11)             | 23 (14)         | 44 (46)             | 60 (22)         | 65 (70)             | 68 (62)         | 73 (39)             | 106 (62)        |
| Kwan 2020           | —                   | —               | —                   | —               | —                   | —               | 53 (22)             | 69 (75)         | 94 (40)             | 95 (77)         |
| Li 2021             | 230 (185)           | 495 (679)       | —                   | —               | —                   | —               | 230 (124)           | 216 (124)       | —                   | —               |
| Luo 2021            | 121 (86)            | 135 (106)       | —                   | —               | 48 (17)             | 43 (17)         | 142 (96)            | 119 (46)        | —                   | —               |
| Mag Uidhir 2020     | 234 (261)           | 331 (406)       | —                   | —               | —                   | —               | —                   | —               | —                   | —               |
| Mitra 2020          | 560 (837)           | 501 (831)       | 67 (34)             | 57 (58)         | —                   | —               | —                   | —               | —                   | —               |
| Naccarato 2020      | 101 (93)            | 110 (73)        | —                   | —               | 69 (59)             | 50 (19)         | 84 (37)             | 81 (23)         | —                   | —               |
| Nagamine 2020       | 554 (605)           | 1041 (1682)     | 18 (12)             | 25 (33)         | 50 (20)             | 50 (37)         | 132 (23)            | 109 (32)        | —                   | —               |
| Neves-Briard 2020   | 121 (111)           | 191 (244)       | 16 (8)              | 17 (7)          | 24 (7)              | 33 (12)         | 58 (21)             | 76 (28)         | 83 (25)             | 105 (26)        |
| Padmanabhan 2020    | 634 (799)           | 690 (636)       | —                   | —               | 64 (47)             | 54 (30)         | 445 (566)           | 181 (62)        | —                   | —               |
| Paliwal 2020        | 102 (72)            | 91 (70)         | 2 (5)               | 0 (0)           | 48 (15)             | 48 (15)         | 101 (36)            | 112 (30)        | —                   | —               |
| Plumereau 2020      | 87 (45)             | 97 (60)         | 25 (17)             | 32 (29)         | 60 (27)             | 62 (26)         | 82 (21)             | 86 (35)         | —                   | —               |
| Rinkel 2020         | 256 (349)           | 288 (398)       | 14 (10)             | 14 (10)         | 30 (14)             | 34 (23)         | 95 (53)             | 112 (68)        | —                   | —               |
| Rudilosso 2020      | 146 (91)            | 146 (99)        | 22 (5)              | 23 (5)          | 28 (10)             | 31 (34)         | 70 (25)             | 59 (20)         | —                   | —               |
| Siegler 2020        | 596 (940)           | 584 (692)       | 88 (143)            | 61 (95)         | 39 (20)             | 52 (61)         | —                   | —               | —                   | —               |
| Tan 2021            | 499 (626)           | 451 (565)       | —                   | —               | 43 (34)             | 52 (26)         | 271 (162)           | 109 (71)        | —                   | —               |
| Tejada-Meza 2020    | 78 (43)             | 88 (53)         | —                   | —               | 52 (25)             | 57 (23)         | 89 (40)             | 91 (40)         | —                   | —               |
| Teo 2020            | 148 (176)           | 277 (422)       | —                   | —               | 66 (34)             | 55 (38)         | 118 (26)            | 89 (47)         | —                   | —               |
| Uchino 2020         | 190 (263)           | 211 (289)       | 32 (30)             | 29 (27)         | —                   | —               | —                   | —               | —                   | —               |
| Velilla-Alonso 2021 | 311 (416)           | 386 (503)       | 31 (33)             | 28 (21)         | 39 (32)             | 53 (57)         | 95 (41)             | 95 (37)         | —                   | —               |
| Wang 2020           | —                   | —               | —                   | —               | 58 (44)             | 41 (16)         | 108 (128)           | 83 (53)         | —                   | —               |
| Yang 2020           | 303 (197)           | 295 (199)       | —                   | —               | —                   | —               | 131 (31)            | 172 (52)        | 180 (55)            | 215 (63)        |
| Zhang 2021          | 167 (72)            | 245 (86)        | —                   | —               | —                   | —               | 71 (45)             | 54 (46)         | —                   | —               |
| Zini 2020           | —                   | —               | 28 (13)             | 37 (15)         | 68 (21)             | 73 (34)         | —                   | —               | 170 (53)            | 186 (83)        |

**Appendix 2:** The reported time metrics for each study for the COVID-19 time period and the pre-COVID-19 time period are displayed. Data are presented in minutes as mean (standard deviation). A blank value (-) indicates that the specified time metric was not reported in the corresponding study. In the event that median times were reported, mean values and standard deviations were calculated as described in the methods utilizing the method from Hoza et al.<sup>4</sup> **Legend:** LKW: last known well; DTI: door-to-imaging; DTN: door-to-needle; DTG: door-to-groin; DTR: door-to-reperfusion

### Appendix 3: Funnel Plots

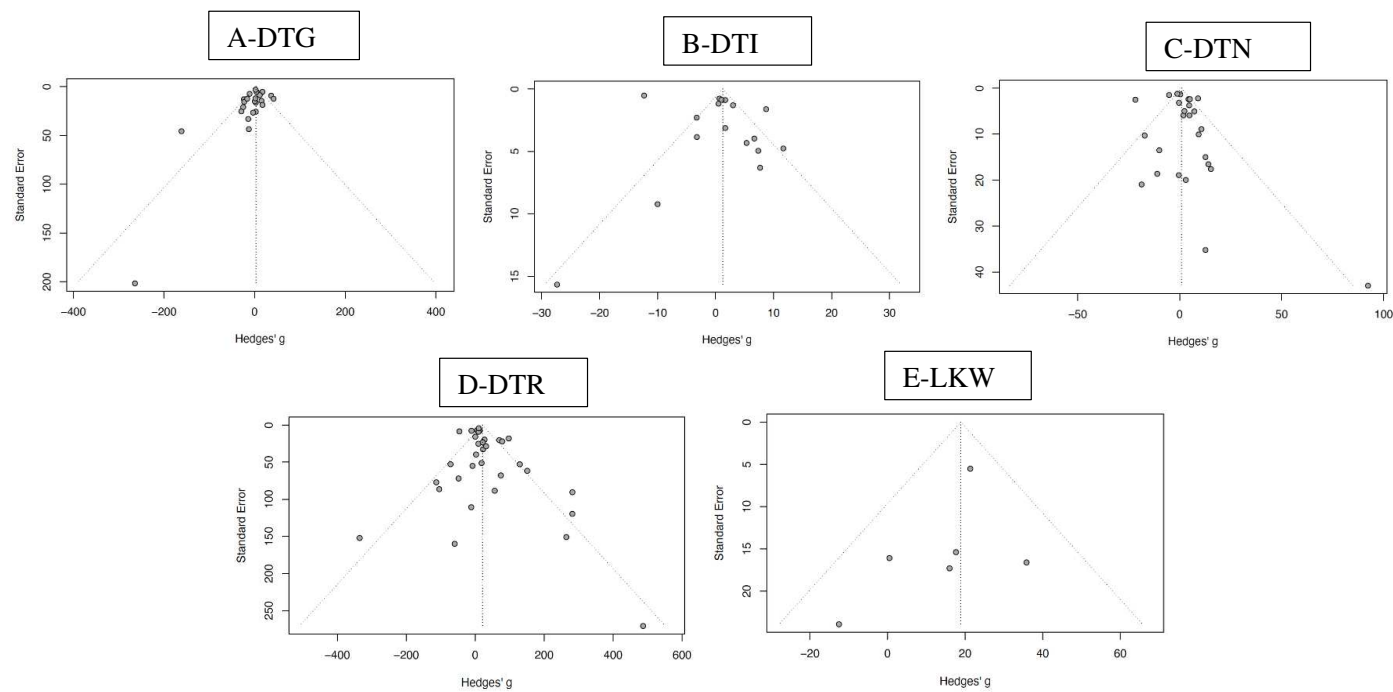

**Appendix 4: Stroke Time Metric Funnel Plots.** Hedges'  $g$  is inversely plotted against the standard error for each study. Asymmetry in the funnel plots could be due to heterogeneity or publication bias. Separate funnel plots are shown for door-to-groin (A), door-to-imaging (B), door-to-needle (C), door-to-reperfusion (D), and last-known-well to arrival (E).

**Appendix 4: Egger's Test Results**

| Stroke Metric | Egger's p-value |
|---------------|-----------------|
| LKW           | 0.12            |
| DTI           | 0.12            |
| DTN           | 0.40            |
| DTR           | 0.34            |
| DTG           | 0.17            |

**Appendix 4:** The results from Egger's Test are shown for each stroke time.

**Appendix 5: Additional Information**

While this review was conducted according to the 2020 PRISMA guidelines, it was not registered. A protocol for this review was constructed before the initiation of the study, and is available upon request of the primary author. This review received no funding. The authors have no competing interests to declare. Data collection forms, data extracted from individual studies, data used for all analyses, and analytic code are all stored locally and can be made available upon request of the primary author.
